# Supplementary material for: Cerebrospinal fluid sTREM2 in Alzheimer’s disease: comparisons between clinical presentation and AT classification
Source: PubMed Central journal article supplement (PMC7522273; doi:10.1038/s41598-020-72878-8), 2020-09-28
Supplement: 41598_2020_72878_MOESM1_ESM.pdf [file 41598_2020_72878_MOESM1_ESM.pdf]

Supplementary

## Cerebrospinal fluid sTREM2 in Alzheimer's disease - comparisons between clinical presentation and AT classification

Anne-Brita Knapskog\* <sup>1</sup>, Kristi Henjum<sup>2,3</sup>, Ane-Victoria Idland<sup>1,4</sup>, Rannveig Sakshaug Eldholm<sup>5,6</sup>, Karin Persson<sup>1,7</sup>, Ingvild Saltvedt<sup>5,6</sup>, Leiv Otto Watne<sup>1</sup>, Knut Engedal<sup>1,7</sup>, Lars N.G. Nilsson<sup>2</sup>.

<sup>1</sup> Department of Geriatric Medicine, Oslo University Hospital, Oslo, Norway

<sup>2</sup> Department of Pharmacology, Institute of Clinical Medicine, University of Oslo and Oslo University Hospital, Oslo, Norway

<sup>3</sup> Department of Geriatric Medicine, Institute of Clinical Medicine, University of Oslo, Oslo, Norway

<sup>4</sup> Institute of Basic Medical Sciences, University of Oslo, Oslo, Norway

<sup>5</sup> Department of Neuromedicine and Movement Science, Norwegian University of Science and Technology (NTNU), Trondheim,

<sup>6</sup> Department of Geriatrics, St Olavs Hospital, University Hospital of Trondheim,

<sup>7</sup> Norwegian National Advisory Unit on Ageing and Health, Vestfold Hospital Trust,

Supplementary Table 1. AT(N) classification

|                                | <b>A-T-(N-)</b> | <b>A+T-(N-)</b> | <b>A+T+(N-)</b> | <b>A+T+(N+)</b> | <b>A+T-(N+)</b> | <b>A-T+(N-)</b> | <b>A-T-(N+)</b> | <b>A-T+(N+)</b> |
|--------------------------------|-----------------|-----------------|-----------------|-----------------|-----------------|-----------------|-----------------|-----------------|
| The whole cohort (n [%])       | 75 (18.2)       | 58 (14.1)       | 7 (1.7)         | 158 (38.3)      | 51 (12.4)       | 2 (0.5)         | 12 (2.9)        | 49 (11.9)       |
| sTREM2 ng/ml (mean [SD])       | 7.9 (3.6)       | 6.8 (2.9)       | 7.5 (1.2)       | 10.9 (5.0)      | 8.8 (4.0)       | 12.2 (0.1)      | 9.2 (3.4)       | 10.8 (4.2)      |
| AD-MCI (n [%])                 | 10 (16.1)       | 12 (19.4)       | 0               | 25 (40.3)       | 9 (14.5)        | 1 (1.6)         | 2 (3.2)         | 3 (4.8)         |
| sTREM2 ng/ml (mean [SD])       | 7.0 (3.7)       | 8.1 (4.2)       |                 | 11.9 (4.9)      | 9.5 (3.0)       | 12.2            | 10.3 (1.4)      | 9.9 (5.4)       |
| AD dementia patients (n [%])   | 19 (8.0)        | 32 (13.5)       | 5 (2.1)         | 122 (51.5)      | 40 (16.9)       | 1 (0.4)         | 4 (1.7)         | 14 (5.9)        |
| sTREM2 ng/ml (mean [SD])       | 8.9 (5.5)       | 6.4 (2.5)       | 7.5 (0.8)       | 10.6 (5.0)      | 8.7 (4.2)       | 12.2            | 7.9 (4.1)       | 10.7 (4.0)      |
| Cognitively unimpaired (n [%]) | 46 (40.7)       | 14 (12.4)       | 2 (1.8)         | 11 (9.7)        | 2 (1.8)         | 0               | 6 (5.3)         | 32 (28.3)       |
| sTREM2 ng/ml (mean [SD])       | 7.7 (2.5)       | 6.6 (2.2)       | 7.2 (2.4)       | 10.8 (4.1)      | 7.2 (4.8)       |                 | 9.7 (3.5)       | 10.9 (4.2)      |

Comparison not possible due to few or no participants in some groups

Supplementary Table 2. A+T+N+ versus A+T-N+

|                                | <b>A+T+N+</b> | <b>A+T-N+</b> | <b>P</b> |
|--------------------------------|---------------|---------------|----------|
| The whole cohort (n [%])       | 158 (38.3)    | 51 (12.4)     |          |
| sTREM2 ng/ml (mean [SD])       | 10.9 (5.0)    | 8.8 (4.0)     | 0.007a   |
| AD-MCI (n [%])                 | 25 (40.3)     | 9 (14.5)      |          |
| sTREM2 ng/ml (mean [SD])       | 11.9 (4.9)    | 9.5 (3.0)     | 0.18a    |
| AD dementia patients (n [%])   | 122 (51.5)    | 40 (16.9)     |          |
| sTREM2 ng/ml (mean [SD])       | 10.6 (5.0)    | 8.7 (4.2)     | 0.02a    |
| Cognitively unimpaired (n [%]) | 11 (9.7)      | 2 (1.8)       |          |
| sTREM2 ng/ml (mean [SD])       | 10.8 (4.1)    | 7.2 (4.8)     | *        |

a = Mann-Whitney test, \*comparison not possible due to few patients in one group
